# Supplementary material for: Homoarginine and inhibition of human arginase activity: kinetic characterization and biological relevance
Source: PubMed Central journal article supplement (PMC5829263; doi:10.1038/s41598-018-22099-x), 2018-02-27
Supplement: 41598_2018_22099_MOESM1_ESM.pdf [file 41598_2018_22099_MOESM1_ESM.pdf]

# **Homoarginine and inhibition of human arginase activity: kinetic characterization and biological relevance**

S. Tommasi<sup>1</sup>, D.J. Elliot<sup>1</sup>, M. Da Boit<sup>2</sup>, S.R. Gray<sup>3</sup>, B.C. Lewis<sup>1,4</sup>, A.A. Mangoni<sup>1\*</sup>

<sup>1</sup>Department of Clinical Pharmacology, College of Medicine and Public Health, Flinders University and Flinders Medical Centre, Adelaide, Australia;

<sup>2</sup>Faculty of Health and Life Sciences, De Montfort University, Leicester, United Kingdom;

<sup>3</sup>Institute of Cardiovascular and Medical Sciences, University of Glasgow, Glasgow, United Kingdom;

<sup>4</sup>Flinders Centre for Innovation in Cancer, College of Medicine and Public Health, Flinders University, Adelaide, Australia;

## SUPPLEMENTARY FIGURES

### anti-arginase 1

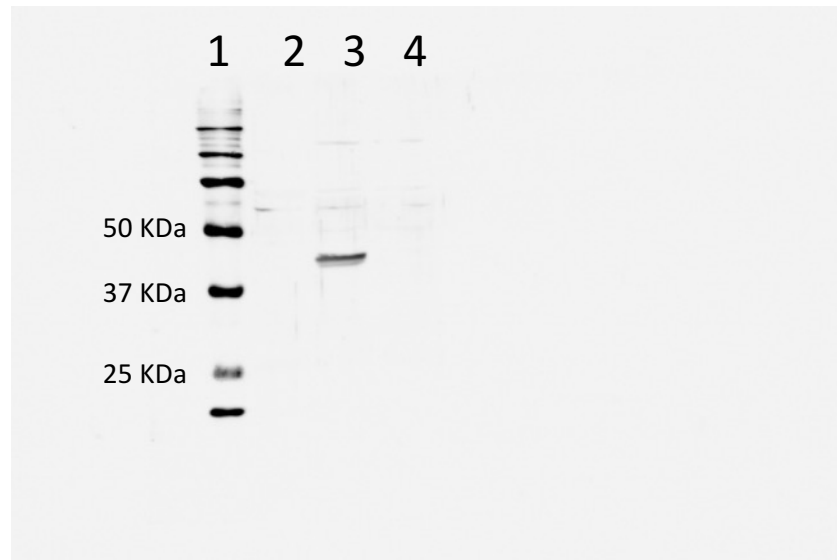

**Figure S1.** Expression of recombinant arginase 1 and arginase 2 in HEK293T cell lysate as shown by representative western blots performed using anti-arginase 1. Each blot shows: molecular markers (lane 1), untransfected HEK293T cell lysate (lane 2, 100  $\mu$ g), arginase 1 lysate (lane 3, 30  $\mu$ g), and arginase 2 lysate (lane 4, 30  $\mu$ g).

## anti-arginase 2

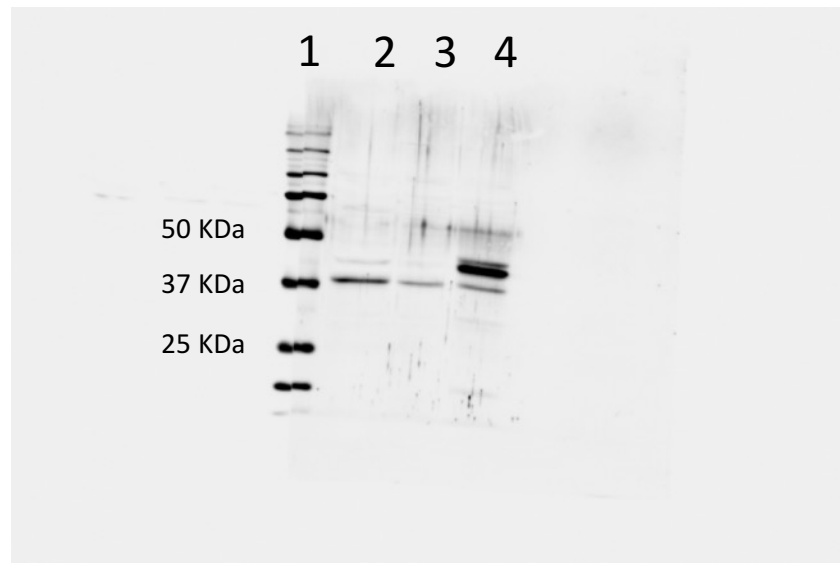

**Figure S2.** Expression of recombinant arginase 1 and arginase 2 in HEK293T cell lysate as shown by representative western blots performed using anti-arginase 2. Each blot shows: molecular markers (lane 1), untransfected HEK293T cell lysate (lane 2, 100  $\mu$ g), arginase 1 lysate (lane 3, 30  $\mu$ g), and arginase 2 lysate (lane 4, 30  $\mu$ g).

anti-FLAG

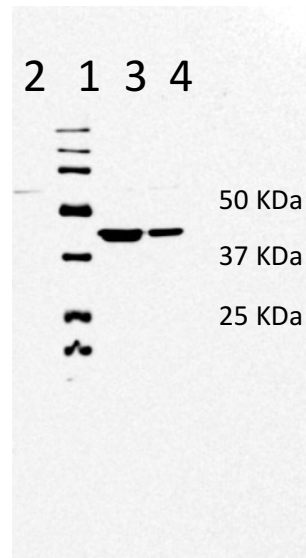

**Figure S3.** Expression of recombinant arginase 1 and arginase 2 in HEK293T cell lysate as shown by representative western blots performed using anti-FLAG. Each blot shows: molecular markers (lane 1), untransfected HEK293T cell lysate (lane 2, 100  $\mu$ g), arginase 1 lysate (lane 3, 30  $\mu$ g), and arginase 2 lysate (lane 4, 30  $\mu$ g).
